# Supplementary material for: Improvement of Dietary Habits among German Medical Students by Attending a Nationwide Online Lecture Series on Nutrition and Planetary Health (“Eat This!”)
Source: MDPI journal article supplement (doi:10.3390/nu15030580), 2023-01-22
Supplement: s1 [file s1]

## Supplementary Material

Improvement of dietary habits among German medical students by attending a nation-wide online lecture series on nutrition and planetary health ("*Eat This!*").

Anna Helbach, Moritz Dumm, Katharina Moll, Tim Böttlich, Can Gero Leineweber, Wiebke Müller, Jan Matthes<sup>†</sup>, Maria Cristina Polidori<sup>†</sup>

<sup>†</sup> Equal contribution.

**Supplementary Table S1:** Lecture schedule of the lecture series "*Eat This!*" from November 2020 - January 2021

|    | Title                                                      | Contents                                                                                                                                                                                            |
|----|------------------------------------------------------------|-----------------------------------------------------------------------------------------------------------------------------------------------------------------------------------------------------|
| 1  | Introduction to Nutritional Medicine                       | The importance of nutrition as a risk factor for non-communicable diseases                                                                                                                          |
| 2  | Nutritional Psychology and behavior change                 | Behavior change counseling, motivational interviewing, essential models of nutritional psychology, satiety and appetite regulation, reward system                                                   |
| 3  | Nutritional Medicine and Gastroenterology                  | Definitions of microbiome, prebiotics, probiotics, gut-brain axis, gut dysbiosis and correlations with diseases, intolerances (gluten, fructose, lactose) and allergies                             |
| 4  | Nutritional therapy in Oncology and Pharmaconutrition      | Tumor cachexia, nutritional assessment in oncology patients, nutritional risk factors for cancer, pharmaconutrition (drug-nutrient interactions)                                                    |
| 5  | Nutritional Medicine and Geriatrics                        | Definitions (sarcopenia), nutritional risk factors for dementia, risk factors and consequences of malnutrition, indications and characteristics for artificial nutrition (enteral, parenteral)      |
| 6  | Nutrition and Climate Change                               | Role of nutrition in the climate crisis and mitigation of global warming, role of nutrition and agriculture in the development of antibiotic resistance and global pandemics                        |
| 7  | Nutritional Medicine in Cardiology                         | Lipoprotein Metabolism and Pathogenesis of Cardiovascular Disease, Nutritional Recommendations for Patients (Fatty Acids, Salt, DASH Diet)                                                          |
| 8  | Nutritional therapy of autoimmune diseases and fasting     | Definitions, benefits of including and excluding individual food groups, types of fasting, potential health benefits and risks of fasting                                                           |
| 9  | Plant-based diets in childhood and Nutrition in Pediatrics | Definitions, advantages and disadvantages of vegan diets, critical nutrients, supplementation of critical nutrients in childhood, prognostic relevance of childhood obesity, childhood malnutrition |
| 10 | Nutritional Medicine in Diabetology                        | Definition of BMI, obesity, metabolic syndrome and forms of diabetes, pathophysiology of diabetes, nutritional recommendations for diabetic patients and treatment options                          |
| 11 | Nutrition and Public Health                                | Health systems, health care financing, current threats to public health, food pricing and taxation, food supply                                                                                     |

**Supplementary Table S2.** Items per food group and criteria for the guideline adherence score.

| Foodgroup         | Items                                                                      | Criteria for a score of 0<br>(below guideline recommendation*) | Criteria for a score of 1<br>(meeting guideline recommendation*) | Criteria for a score of 2<br>(Above guideline recommendation*) |
|-------------------|----------------------------------------------------------------------------|----------------------------------------------------------------|------------------------------------------------------------------|----------------------------------------------------------------|
| Fruits            | Fruits,<br>Fruitjuice<br>max. 1/day                                        | <250 g / day                                                   | >250 g / day                                                     | Not applicable                                                 |
| Vegetables        | Vegetables,<br>Salad,<br>Legumes                                           | <400 g / day                                                   | >400 g / day                                                     | Not applicable                                                 |
| Nuts              | Nuts                                                                       | 0 g / day                                                      | 1-25 g / day                                                     | >25 g / day                                                    |
| Wholemeal         | Fibre-rich<br>cereals,<br>porridge,<br>oats, Muesli,<br>wholemeal<br>bread | <200 g / day                                                   | 200-360 g / day                                                  | >360 g / day                                                   |
| Dairy             | Cheese,<br>Yoghurt,<br>Milk                                                | <250 g / day                                                   | 250-300 g / day                                                  | >300 g / day                                                   |
| Fish              | Fish (all<br>forms) and<br>Seafood                                         | <150 g / week                                                  | 150-220 g / week                                                 | >220 g / week                                                  |
| Meat              | Red meat,<br>white meat,<br>processed<br>meat                              | <300 g / week                                                  | 300-600 g / week                                                 | >600 g / week                                                  |
|                   |                                                                            | Criteria for a score of 0<br>(above max. tolerated amount)     | Criteria for a score of 1<br>(below max. tolerated amount)       |                                                                |
| Eggs              | Egg                                                                        | >180 g / week                                                  | <180 g / week                                                    |                                                                |
| Sweet beverages   | Fruit Juice,<br>Icetea,<br>Softdrinks                                      | >192 g / day                                                   | <192 g / day                                                     |                                                                |
| Crisps and sweets | Crisps, Salty<br>Snacks,<br>Sweets,<br>Cake,<br>Chocolate,<br>Ice Cream    | >49 g / day                                                    | <49 g / day                                                      |                                                                |

\*Recommendations as indicated by the German Nutrition Society[6] and Kuhn[30].

**Supplementary Table S3.** Calculation of consumption frequencies per 28 days per answer category.

| Answer categories | Frequency             | Amount per 28 days | Calculation |
|-------------------|-----------------------|--------------------|-------------|
| 0                 | Rarely/never          | 0                  | 0*0         |
| 1                 | Less then once a Week | 1                  | 1*1         |
| 2                 | Once a Week           | 4                  | 1*4         |
| 3                 | 2-3 times a Week      | 10                 | 1.5*4       |
| 4                 | 4-6 times a Week      | 20                 | 5*4         |
| 5                 | 1-2 times a Day       | 42                 | 1.5*28      |
| 6                 | 3-4 times a Day       | 98                 | 3.5*28      |
| 7                 | 5+ times a Day        | 168                | 6*26        |
| Meat              |                       |                    |             |
| 0                 | Rarely/never          | 0                  | 0*0         |
| 1                 | Less then once a Week | 1                  | 1*1         |
| 2                 | Once a Week           | 4                  | 1*4         |
| 3                 | 2-3 times a Week      | 10                 | 1.5*4       |
| 4                 | 4-6 times a Week      | 20                 | 5*4         |
| 5                 | 7+ a Week             | 42                 | 1.5*28      |

Calculation adapted from Kuhn[30].

**Supplementary Table S4.** Standard amount in gram per serving size.

| Food item        | Standard serving size | Standard amount in g |
|------------------|-----------------------|----------------------|
| Fruit            | 1 Piece               | 150                  |
| Fruitjuice       | 1 Glass (200ml)       | 200                  |
| Salad            | 1 Serving             | 150                  |
| Vegetables       | 1 Serving             | 150                  |
| Fried potatoes   | 1 Serving             | 150                  |
| Legumes          | 1 Serving             | 150                  |
| Cereals          | 1 Serving             | 50                   |
| Wholemeal bread  | 1 Slice               | 50                   |
| Eggs             | 1 Egg                 | 60                   |
| Milk             | 1 Serving             | 50                   |
| Cheese / Yoghurt | 1 Serving             | 150                  |
| Nuts             | 1 Serving             | 25                   |
| Crisps, Cracker  | 1 Serving             | 50                   |
| Sweets, Cake     | 1 Serving             | 100                  |
| Ice Cream        | 1 Serving             | 75                   |
| Softdrinks       | 1 Glass (200ml)       | 200                  |
| Red meat         | 1 Serving             | 120                  |
| Poultry          | 1 Serving             | 150                  |
| Processed meat   | 1 Serving             | 150                  |
| Fried white fish | 1 Serving             | 90                   |
| White fish       | 1 Serving             | 90                   |
| Oily fish        | 1 Serving             | 90                   |

Standard amounts per serving size adapted from German Nutrition Society[6] Kuhn[30].

**Supplementary Table S5.** Food intake in relation to national guideline recommendations pre- and post-course of lecture participants' as well as of students in the comparison group in percent.

| Foodgroup            | T0                       |                          |                          | T1                       |                          |                          | p-value |
|----------------------|--------------------------|--------------------------|--------------------------|--------------------------|--------------------------|--------------------------|---------|
|                      | Below                    | Meeting                  | Above                    | Below                    | Meeting                  | Above                    |         |
|                      | Recomm-<br>endation<br>% | Recomm-<br>endation<br>% | Recomm-<br>endation<br>% | Recomm-<br>endation<br>% | Recomm-<br>endation<br>% | Recomm-<br>endation<br>% |         |
| Lecture participants |                          |                          |                          |                          |                          |                          |         |
| Fruits*              | 68.8                     | 31.2                     | -                        | 66.5                     | 33.5                     | -                        | 0.011   |
| Vegetables***        | 75.6                     | 24.4                     | -                        | 69                       | 31                       | -                        | <0.001  |
| Nuts***              | 20.6                     | 57.5                     | 21.9                     | 15.8                     | 52.1                     | 32.1                     | <0.001  |
| Wholemeal            | 97.5                     | 1.9                      | 0.6                      | 97.7                     | 1.5                      | 0.8                      | 0.250   |
| Dairy*               | 77.3                     | 15.8                     | 6.9                      | 81                       | 12.8                     | 6.2                      | 0.004   |
| Fish                 | 89.6                     | 4.8                      | 5.6                      | 87.3                     | 5.8                      | 6.9                      | 0.059   |
| Meat***              | 70.6                     | 19.6                     | 9.8                      | 78.1                     | 14.6                     | 7.3                      | <0.001  |
| Sweet beverages      | -                        | 95                       | 5                        | -                        | 94.6                     | 5.4                      | 0.011   |
| Crisps and sweets**  | -                        | 54.4                     | 45.6                     | -                        | 60.4                     | 39.6                     | 0.002   |
| Eggs                 | -                        | 75.6                     | 24.4                     | -                        | 77.7                     | 22.3                     | 0.250   |
| Comparison Group     |                          |                          |                          |                          |                          |                          |         |
| Fruits               | 65.6                     | 34.4                     | -                        | 68.8                     | 31.2                     | -                        | 0.65    |
| Vegetables           | 76.6                     | 23.4                     | -                        | 81.3                     | 18.7                     | -                        | 0.196   |
| Nuts                 | 28.1                     | 53.1                     | 18.8                     | 29.7                     | 54.7                     | 15.6                     | 0.302   |
| Wholemeal            | 98.4                     | 0                        | 1.6                      | 95.3                     | 3.1                      | 1.6                      | 0.418   |
| Dairy                | 78.1                     | 18.8                     | 3.1                      | 81.3                     | 12.5                     | 6.2                      | 0.194   |
| Fish and Seafood     | 92.2                     | 4.7                      | 3.1                      | 90.6                     | 3.1                      | 6.3                      | 0.161   |
| Meat                 | 84.4                     | 7.8                      | 7.8                      | 78.1                     | 18.8                     | 3.1                      | 0.644   |
| Sweet beverages      | -                        | 90.6                     | 9.4                      | -                        | 96.9                     | 3.1                      | 0.557   |
| Crisps and sweets    | -                        | 54.7                     | 45.3                     | -                        | 46.9                     | 53.1                     | 0.475   |
| Eggs                 | -                        | 82.8                     | 17.2                     | -                        | 82.8                     | 17.2                     | 0.444   |

Level of significance of observed differences in consumption in gram per day or per week for each food group between pre- to post course as assessed by Wilcoxon signed-rank test, respectively: ns = not significant,  $p > 0.05$ , \*  $p < 0.05$ , \*\*  $p < 0.01$ , \*\*\*  $p < 0.001$ .

**Supplementary Table S6.** Multivariate linear regression analysis: Associations of lecture participants' characteristics, lifestyle habits and attitude with the dietary quality score at baseline ( $n = 1224$ ).

| Independent Covariate   |                                                    | Regression coefficient B | CI 95% | Std. Error | $p$    |
|-------------------------|----------------------------------------------------|--------------------------|--------|------------|--------|
| Age                     | < 20 (Ref)                                         |                          |        |            |        |
|                         | 20-24.9                                            | -0,278                   | -0,728 | 0,172      | 0,226  |
|                         | $\geq 25$                                          | -0,441                   | -0,905 | 0,023      | 0,063  |
| Sex                     | Male (Ref)                                         |                          |        |            |        |
|                         | Female                                             | -0,096                   | -0,28  | 0,088      | 0,305  |
| BMI categories          | Normal weight (Ref)                                |                          |        |            |        |
|                         | Underweight (<18.5 kg/m <sup>2</sup> )             | -0,11                    | -0,379 | 0,158      | 0,419  |
|                         | Overweight / obese ( $\geq 25$ kg/m <sup>2</sup> ) | 0,135                    | -0,098 | 0,368      | 0,256  |
| Alcohol consumption     | None or moderate (Ref)                             |                          |        |            |        |
|                         | High                                               | 0,079                    | -0,099 | 0,257      | 0,385  |
| Physical activity*      | Active (Ref)                                       |                          |        |            |        |
|                         | Inactive                                           | -0,294                   | -0,445 | -0,143     | <0.001 |
| Smoking                 | No (Ref)                                           |                          |        |            |        |
|                         | Yes                                                | 0,187                    | -0,057 | 0,431      | 0,133  |
| Diet*                   | Omnivore (Ref)                                     |                          |        |            |        |
|                         | Vegetarian                                         | -0,236                   | -0,428 | -0,043     | 0,017  |
|                         | Vegan                                              | 0,399                    | 0,169  | 0,628      | <0,001 |
|                         | Pescetarian                                        | 0,313                    | 0,043  | 0,583      | 0,023  |
| Study phase             | Preclinical (Ref)                                  |                          |        |            |        |
|                         | Clinical                                           | 0,156                    | -0,025 | 0,336      | 0,091  |
|                         | Practical year                                     | -0,069                   | -0,359 | 0,222      | 0,643  |
| Healthy Food Awareness* | High (Ref)                                         |                          |        |            |        |
|                         | Low                                                | -0,548                   | -0,702 | -0,394     | <0.001 |
| Personal Responsibility | High (Ref)                                         |                          |        |            |        |
|                         | Low                                                | -0,05                    | -0,21  | 0,109      | 0,534  |

Model's goodness of fit ( $R^2$ ) = 0.112

\* $p$ -value < 0.05 is considered as statistically significant.  $n = 1224$ .
